# Supplementary material for: “Grafting to” route to PVDF-HFP-GMA/BaTiO3 nanocomposites with high dielectric constant and high thermal conductivity for energy storage and thermal management applications
Source: Royal Society of Chemistry journal article supplement (doi:10.1039/c3ta15156e), 2014-01-01
Supplement: c3ta15156e.pdf [file c3ta15156e.pdf]

# “Grafting to” route to PVDF-HFP-GMA/BaTiO<sub>3</sub> nanocomposites with high dielectric constant and high thermal conductivity for energy storage and thermal management application

Liyuan Xie<sup>a</sup>, Xingyi Huang<sup>\*a</sup>, Ke Yang<sup>a</sup>, Shengtao Li<sup>b</sup>, and Pingkai Jiang<sup>a,c</sup>

<sup>a</sup>Department of Polymer Science and Engineering, Shanghai Key Laboratory of Electrical Insulation and Thermal Aging, Shanghai Jiao Tong University, Shanghai 200240, People’s Republic of China.

<sup>b</sup>State Key Lab of Electrical Insulation and Power Equipment, Xi’an Jiaotong University, Xi’an, China

<sup>c</sup>Shanghai Engineering Center for Material Safety of Nuclear Power Equipment, Shanghai 200240, People’s Republic of China.

Email: [xyhuang@sjtu.edu.cn](mailto:xyhuang@sjtu.edu.cn)

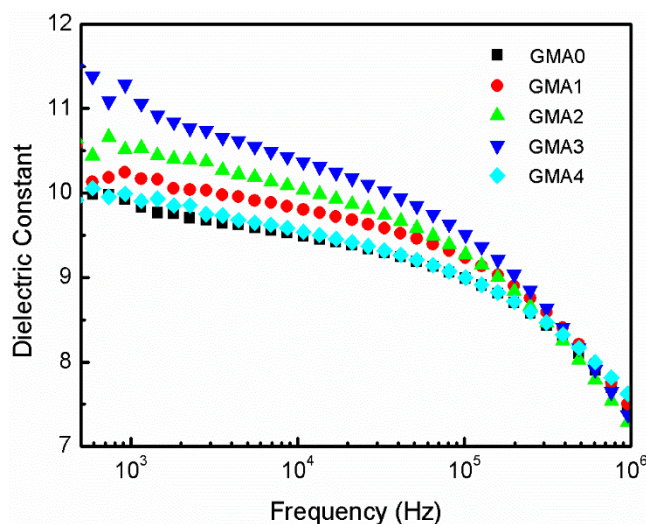

Figure S1. Frequency dependence of dielectric constant for different PVDF-HFP-GMA.

Table S1. Feed ratios of GMA monomer and PVDF-HFP and dielectric constant of different PVDF-HFP-GMA at 1 kHz.

| Sample                      | GMA0 | GMA1 | GMA2 | GMA3 | GMA4 |
|-----------------------------|------|------|------|------|------|
| Weight Ratio (GMA/PVDF-HFP) | 0    | 0.2  | 0.5  | 1.0  | 2.5  |

|                             |     |      |      |      |      |
|-----------------------------|-----|------|------|------|------|
| Dielectric Constant (1 kHz) | 9.8 | 10.1 | 10.6 | 11.0 | 10.0 |
|-----------------------------|-----|------|------|------|------|

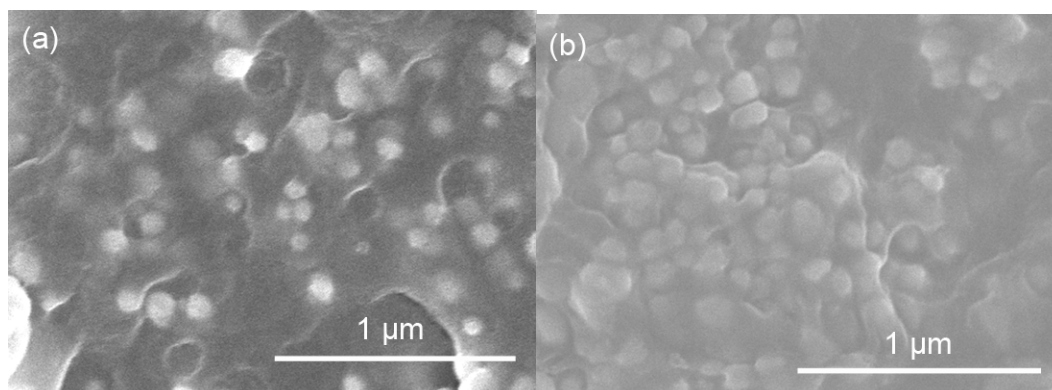

Figure S2. SEM images of fractured surface of (a) PVDF-HFP-GMA/BT and (b) PVDF-HFP/BT. The BT nanoparticle loading is 20 vol% for the two samples.

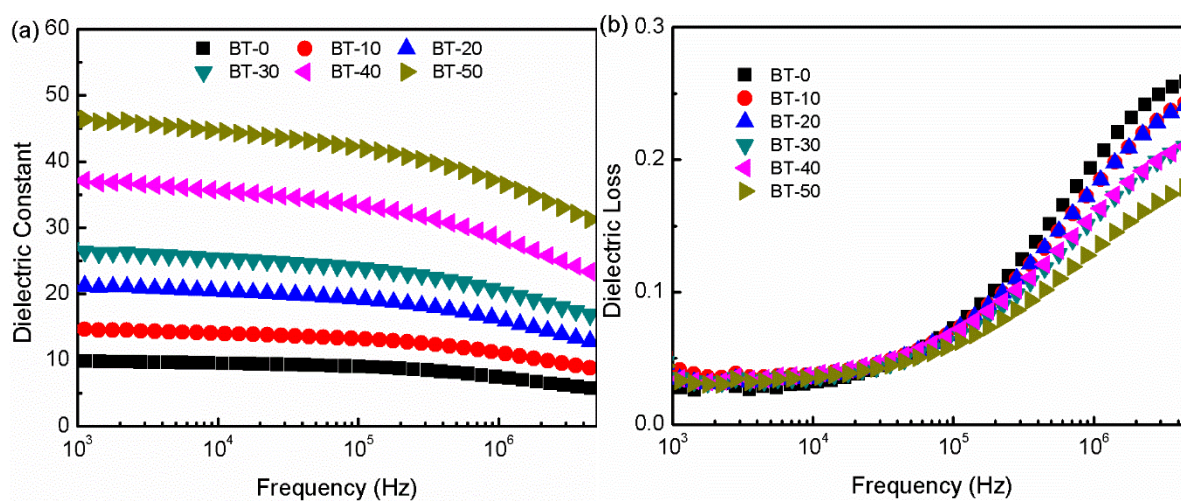

Figure S3. Frequency dependence of dielectric responses of PVDF-HFP/BT nanocomposites at room temperature: (a) dielectric constant, (b) dielectric loss tangent

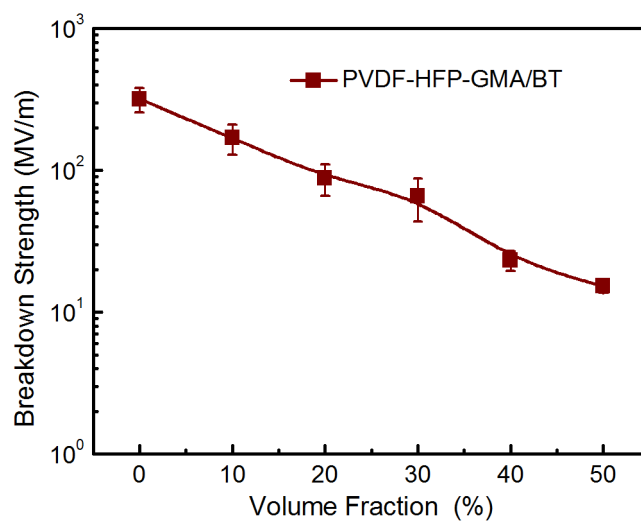

Figure S4. DC breakdown strength of PVDF-HBP-GMA/BT nanocomposites.
